# Supplementary material for: 2,2′-Bipyridine Zn(ii) complexes: effect of the 4,4′ substituents on the crystalline solid state properties
Source: Royal Society of Chemistry journal article supplement (doi:10.1039/c3nj40829a), 2013-01-01
Supplement: c3nj40829a.pdf [file c3nj40829a.pdf]

## Supporting Information

for

### **2,2'-bipyridine Zn(II) complexes: role of the 4,4' substituents on the crystalline solid state properties**

*Yogesh J. Yadav, Teresa F. Mastropietro, Elisabeta Ildyko Szerb, Anna Maria Talarico, Sante Pirillo, Daniela Pucci, Alessandra Crispini and Mauro Ghedini*

**Figure S1.** NMR spectra of the free ligand L1 (a) and the adduct **1a**  $\{[(L1)_3Zn](PF_6)_2\}_2 \cdot L1 \cdot 2H_2O$  (b) with the proton of the coordinated bipyridines labeled as  $ZnH^3$ ,  $ZnH^5$  and  $ZnH^6$ .

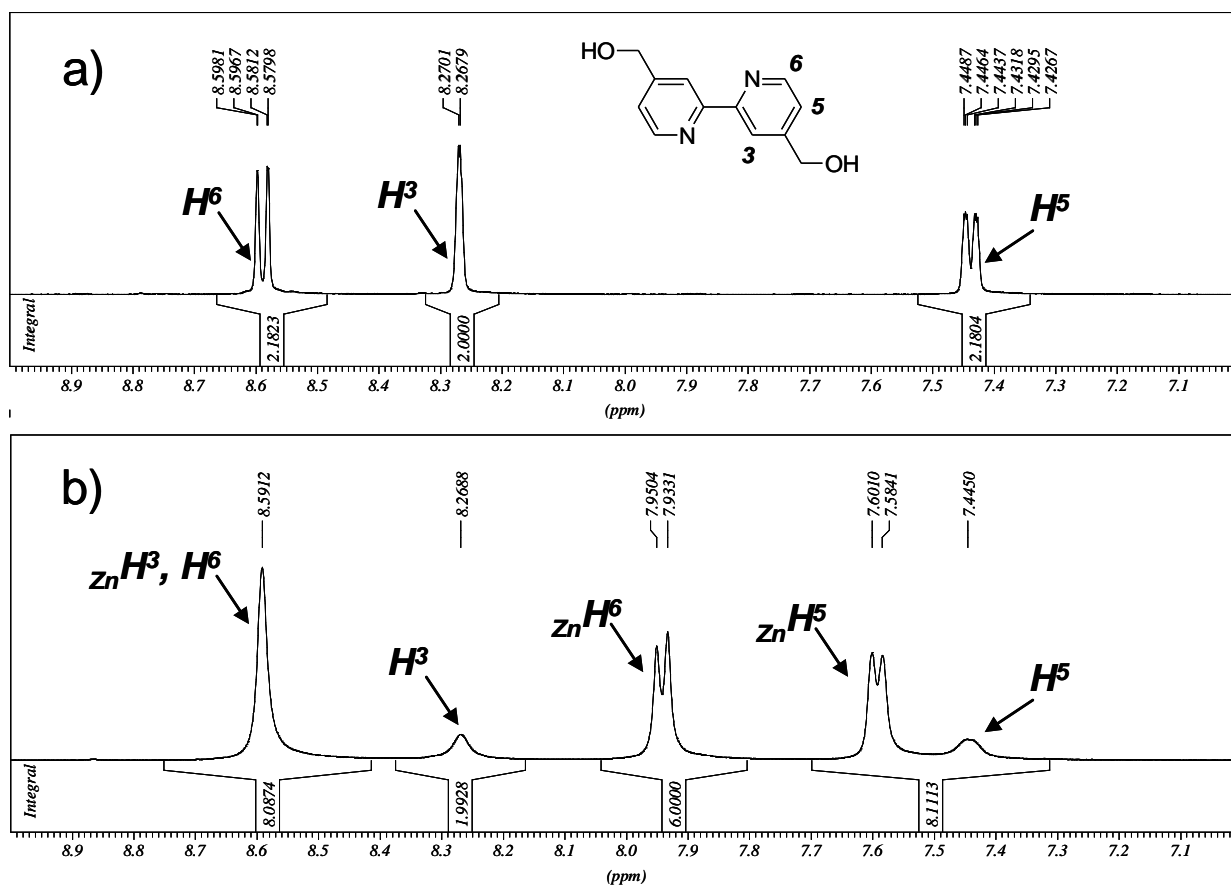

**Figure S2.** PXRD spectrum of the reaction product after grinding in the synthesis of **2a** (black line) superimposed to that of **2** (red line)

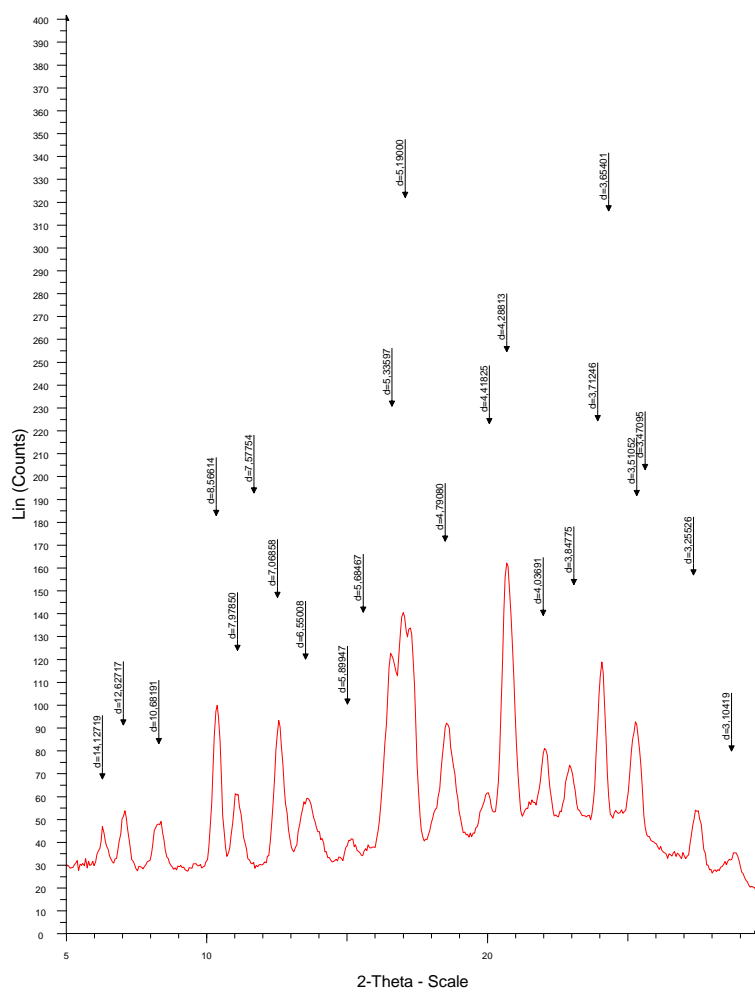

**Figure S3.** PXRD spectrum of the reaction product after grinding in the synthesis of **2b** (black line) superimposed to that of **2** (red line)

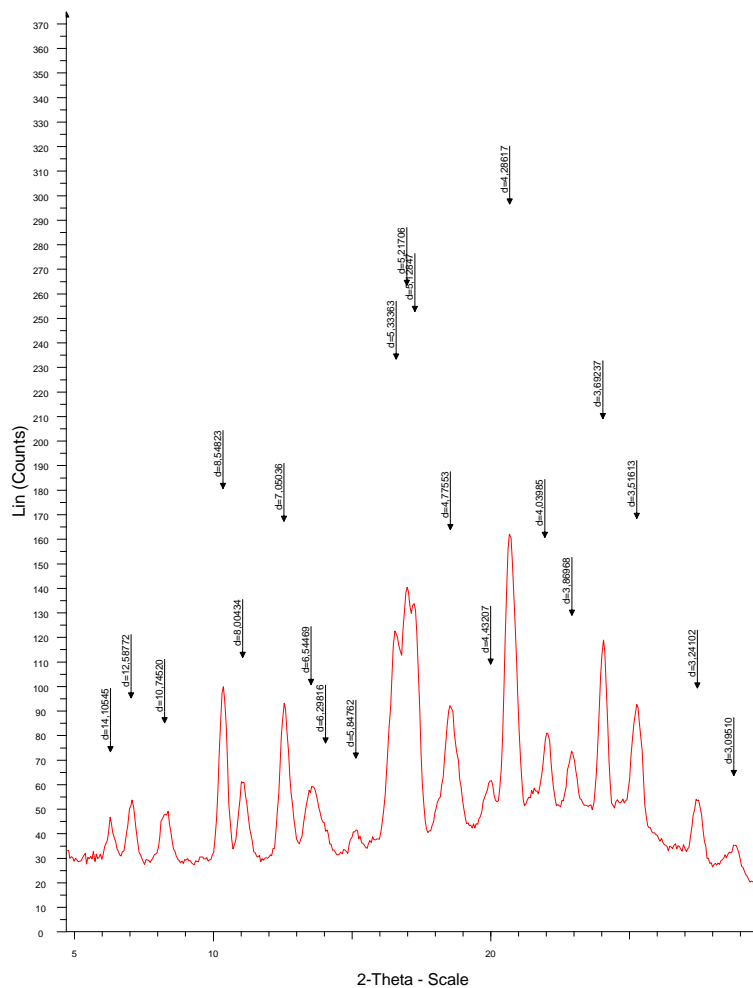

**Figure S4.** Crystals of the supramolecular adduct **2a** (a) and precursor **2** (b).

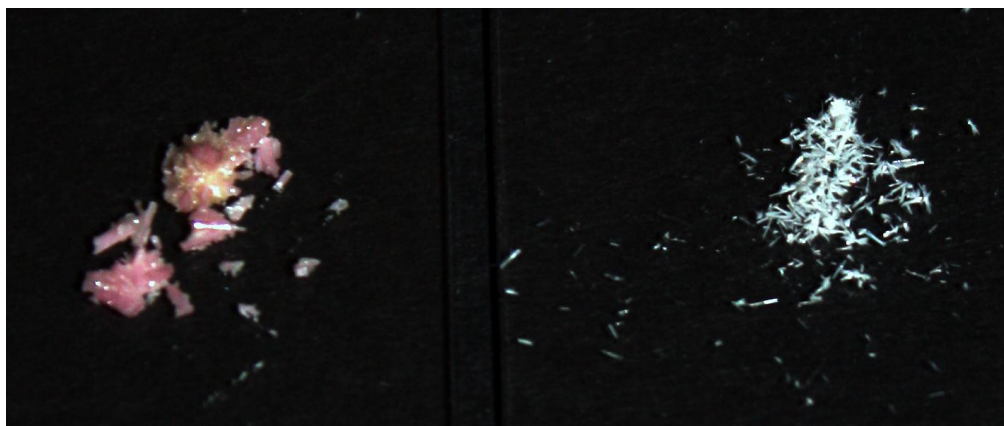

**Table S1** Details of data collection and structure refinements for complexes **1a**, **2a** and **2**

|                                       | <b>1a</b>                                                                                                      | <b>2a</b>                                                                                                      | <b>2</b>                                                                                        | <b>L<sub>1</sub></b>                                          |
|---------------------------------------|----------------------------------------------------------------------------------------------------------------|----------------------------------------------------------------------------------------------------------------|-------------------------------------------------------------------------------------------------|---------------------------------------------------------------|
| formula                               | C <sub>84</sub> H <sub>88</sub> F <sub>24</sub> N <sub>14</sub> O <sub>16</sub> P <sub>4</sub> Zn <sub>2</sub> | C <sub>84</sub> H <sub>88</sub> F <sub>24</sub> N <sub>14</sub> O <sub>16</sub> P <sub>4</sub> Zn <sub>2</sub> | C <sub>36</sub> H <sub>36</sub> F <sub>12</sub> N <sub>6</sub> O <sub>6</sub> P <sub>2</sub> Zn | C <sub>12</sub> H <sub>12</sub> N <sub>2</sub> O <sub>2</sub> |
| <i>Mr</i>                             | 2260.30                                                                                                        | 2260.30                                                                                                        | 1004.02                                                                                         | 216.24                                                        |
| crystal system                        | Triclinic                                                                                                      | Triclinic                                                                                                      | Triclinic                                                                                       | Monoclinic                                                    |
| space group                           | <i>P</i> -1                                                                                                    | <i>P</i> -1                                                                                                    | <i>P</i> -1                                                                                     | <i>p</i> (2) <i>I</i> / <i>c</i>                              |
| <i>a</i> [Å]                          | 12.0842(18)                                                                                                    | 12.1158(12)                                                                                                    | 11.354(3)                                                                                       | 7.507(5)                                                      |
| <i>b</i> [Å]                          | 14.630(2)                                                                                                      | 14.8243(18)                                                                                                    | 13.202(4)                                                                                       | 12.063(8)                                                     |
| <i>c</i> [Å]                          | 14.997(2)                                                                                                      | 15.0480(17)                                                                                                    | 15.056(5)                                                                                       | 16.970(11)                                                    |
| $\alpha$ [°]                          | 68.239(7)                                                                                                      | 67.610(5)                                                                                                      | 76.794(13)                                                                                      | 90                                                            |
| $\beta$ [°]                           | 88.188(7)                                                                                                      | 87.958(5)                                                                                                      | 76.652(13)                                                                                      | 96.79(2)                                                      |
| $\gamma$ [°]                          | 76.637(7)                                                                                                      | 76.494(5)                                                                                                      | 83.772(13)                                                                                      | 90                                                            |
| <i>V</i> [Å <sup>3</sup> ]            | 2391.4(6)                                                                                                      | 2425.6(5)                                                                                                      | 2134.0(12)                                                                                      | 1526.0(18)                                                    |
| <i>Z</i>                              | 1                                                                                                              | 1                                                                                                              | 2                                                                                               | 6                                                             |
| $\rho$ calcd [gcm <sup>-3</sup> ]     | 1.569                                                                                                          |                                                                                                                | 1.563                                                                                           | 1.412                                                         |
| $\mu$ [cm <sup>-1</sup> ]             | 0.686                                                                                                          |                                                                                                                | 0.754                                                                                           | 0.098                                                         |
| $\theta$ range [°]                    | 1.46-26.33                                                                                                     |                                                                                                                | 1.42-26.15                                                                                      | 2.08 to 25.02°                                                |
| data collected                        | 103631                                                                                                         |                                                                                                                | 69588                                                                                           | 15114                                                         |
| unique data, <i>R<sub>int</sub></i>   | 9640, 0.0599                                                                                                   |                                                                                                                | 8353, 0.0414                                                                                    | 2649, 0.0552                                                  |
| obs. data                             | 6787                                                                                                           |                                                                                                                | 6545                                                                                            | 2649                                                          |
| [ <i>I</i> > 2 $\sigma$ ( <i>I</i> )] |                                                                                                                |                                                                                                                |                                                                                                 |                                                               |
| no. parameters                        | 647                                                                                                            |                                                                                                                | 568                                                                                             | 220                                                           |
| <i>R<sub>1</sub></i> [obs. data]      | 0.0873                                                                                                         |                                                                                                                | 0.0457                                                                                          | 0.0485                                                        |
| <i>wR<sub>2</sub></i> [all data]      | 0.2660                                                                                                         |                                                                                                                | 0.1394                                                                                          | 0.1244                                                        |
| GOF                                   | 1.186                                                                                                          |                                                                                                                | 1.019                                                                                           | 1.024                                                         |

**Figure S5** View of the supramolecular tetra-cationic complex supported by  $\pi$ - $\pi$  stacking in **2a**.

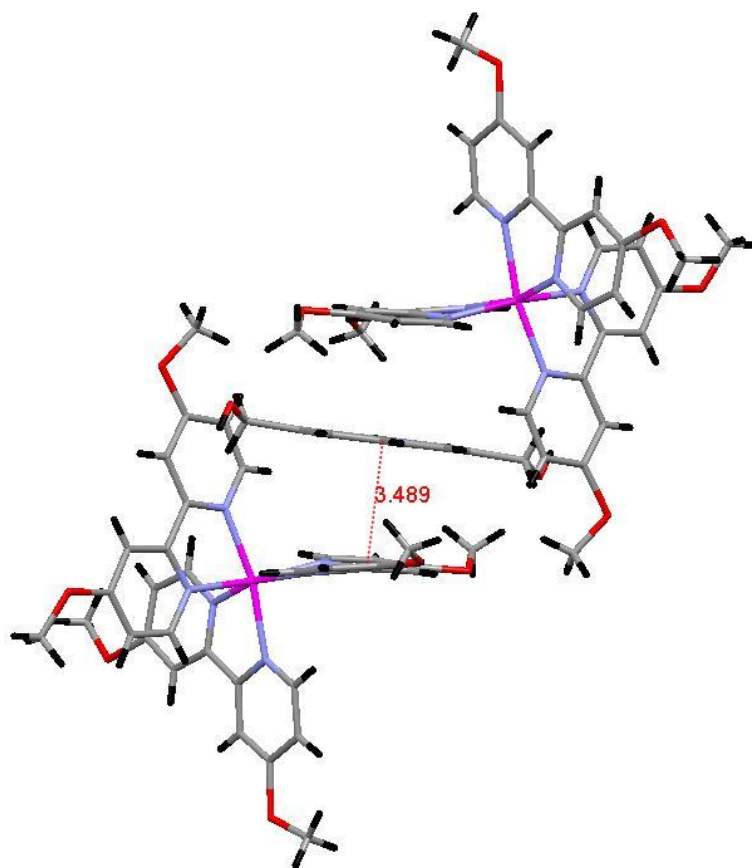

## Structural description of L1.

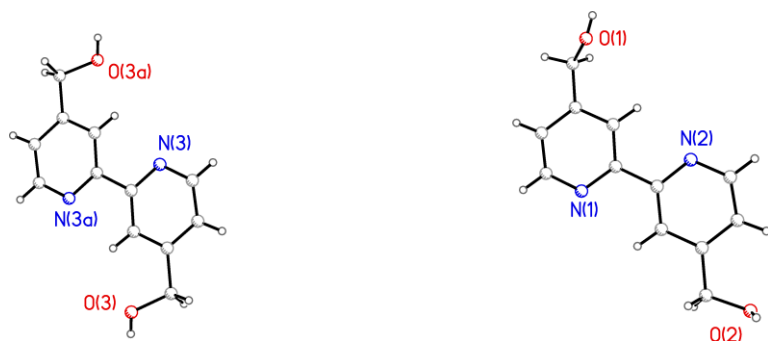

**Figure S6** View of the  $L_1$  ligand showing the atomic labelling scheme;  $a = (x-1, 1-y, -z)$

The crystal structure of the pure ligand  $L_1$  is made up of two crystallographic non equivalent ligands, one of them lying on an inversion centre, both showing the usual NN *trans* conformation. The heteroaromatic rings of the ligands assemble into a columnar organization by means of  $\pi \cdots \pi$  stacking interactions [shortest distances between pyridine planes in the range of 3.4-3.5 Å, as provided by PLATON analysis]. The shortest interplanar distances are observed between pairs of  $\pi \cdots \pi$  stacked ligands for which the additional contribution of hydrogen bonding interactions, similar to those observed in **1a**, is present (Figure 3) [O(2) $\cdots$ O(1) $^i$  2.76(1); O(2)-H(2a) $\cdots$ O(1) $^i$  distance and angle of 1.952 Å and 167.32° respectively;  $i = -x+1, -y, -z+2$ ], proving the tendency of hydrogen bonds to support stacking interactions in these systems.

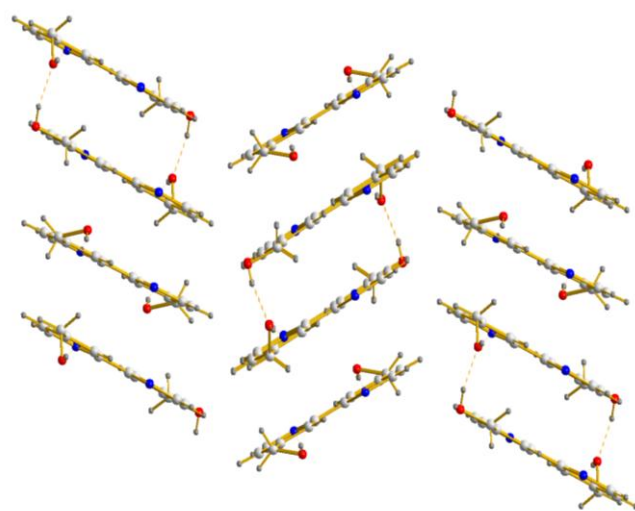

**Figure S7** View of the supramolecular packing along the  $a$  crystallographic axis in  $L_1$ .
